# Supplementary material for: Risk and contributing factors of ecosystem shifts over naturally vegetated land under climate change in China
Source: PubMed Central journal article supplement (PMC4751438; doi:10.1038/srep20905), 2016-02-12
Supplement: srep20905-s1.pdf [file srep20905-s1.pdf]

1

2

3 **Risk and contributing factors of ecosystem shifts over naturally vegetated land under**  
4 **climate change in China**

5 Yuanyuan Yin<sup>1</sup> Qihong Tang<sup>1\*</sup> Lixin Wang<sup>2</sup> Xingcai Liu<sup>1</sup>

6 1 Key Laboratory of Water Cycle and Related Land Surface Processes, Institute of Geographic Sciences and Natural  
7 Resources Research, Chinese Academy of Sciences, Beijing 100101, China

8 2 Department of Earth Sciences, Indiana University-Purdue University Indianapolis (IUPUI), Indianapolis IN 46202,  
9 USA

10 \*Corresponding author email: tangqh@igsrr.ac.cn

11

12 **Contents of this file**

13 Figures S1 to S6

14 Tables S1 to S6

15 References

16

17 **Introduction**

18 This file contains the Supplemental Figure Captions and Table Captions. The references  
19 used in those captions have been listed in Reference.

20

21 Supplemental Figures

22

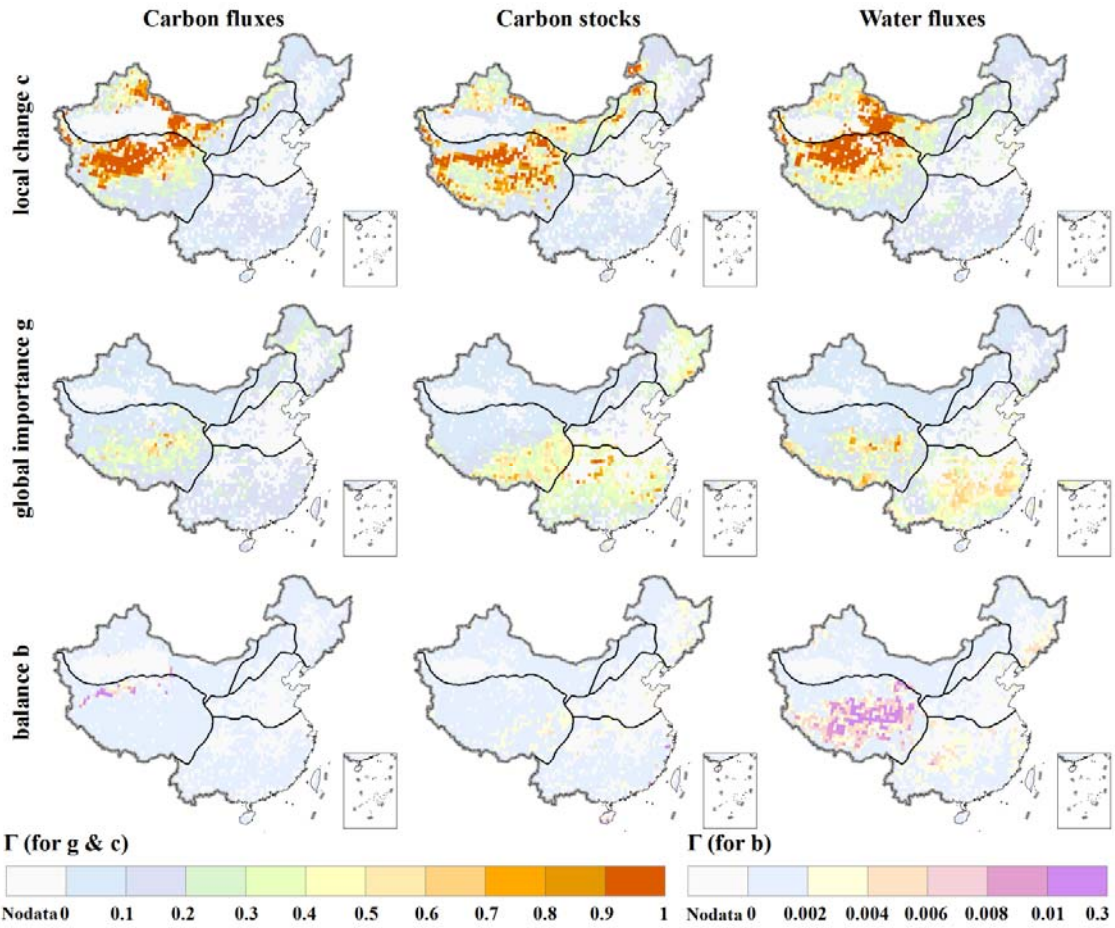

23

24 **Figure S1** Components (local change, global importance, and balance) of the calculated  
25 metric  $\Gamma$  for carbon fluxes (left column), carbon stocks (center column) and water fluxes  
26 (right column) at the end of the 21<sup>st</sup> century under RCP 2.6. Local change ( $c$ ), global  
27 importance ( $g$ ), and balance ( $b$ ) are shown at the top, middle and bottom rows,  
28 respectively. We generate the maps and integrate them into Figure S1 using ArcGIS  
29 software.

30

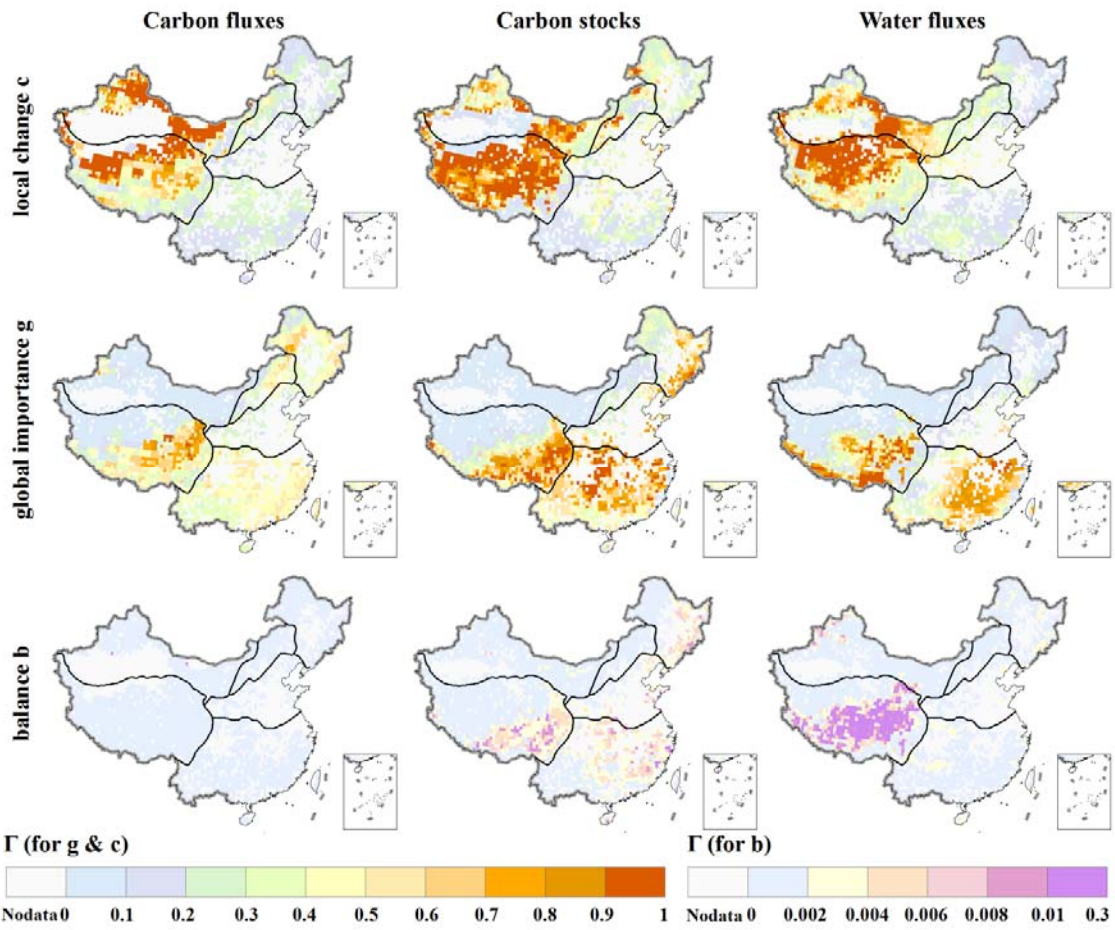

31

32 **Figure S2** Components (local change, global importance, and balance) of the calculated  
 33 metric  $\Gamma$  for carbon fluxes (left column), carbon stocks (center column) and water fluxes  
 34 (right column) at the end of the 21<sup>st</sup> century under RCP 4.5. Local change ( $c$ ), global  
 35 importance ( $g$ ), and balance ( $b$ ) are shown at the top, middle and bottom rows,  
 36 respectively. We generate the maps and integrate them into Figure S2 using ArcGIS  
 37 software.

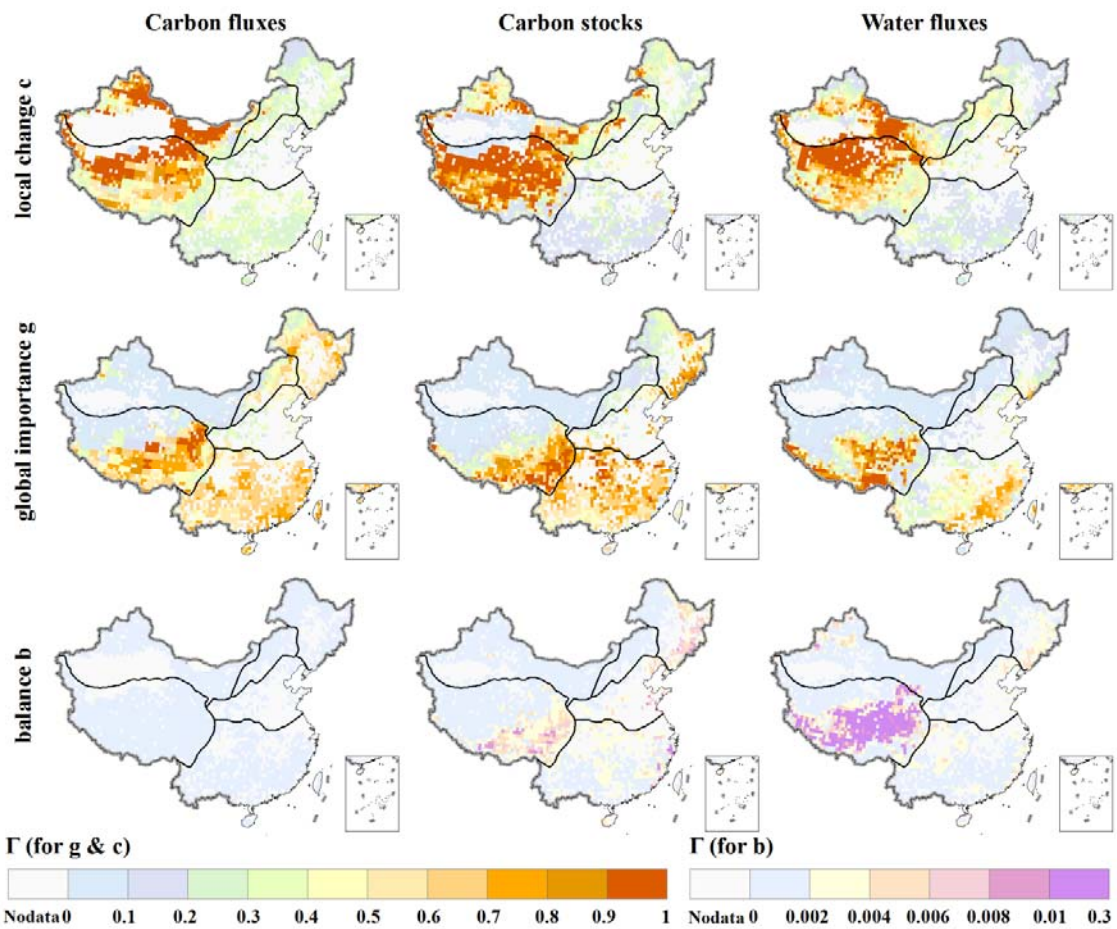

38

39 **Figure S3** Components (local change, global importance, and balance) of the calculated  
 40 metric  $\Gamma$  for carbon fluxes (left column), carbon stocks (center column) and water fluxes  
 41 (right column) at the end of the 21<sup>st</sup> century under RCP 6.0. Local change ( $c$ ), global  
 42 importance ( $g$ ), and balance ( $b$ ) are shown at the top, middle and bottom rows,  
 43 respectively. We generate the maps and integrate them into Figure S3 using ArcGIS  
 44 software.

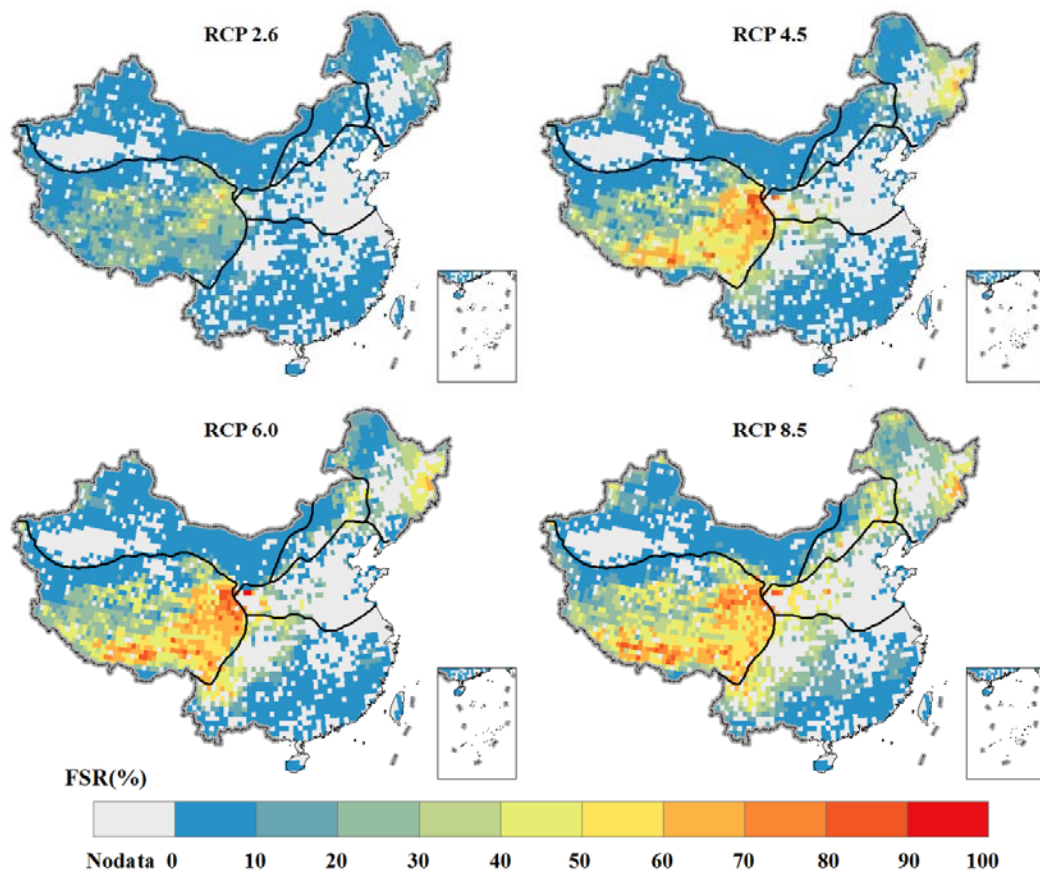

45

46 **Figure S4** Fraction of severe risk estimates (FSR) at the end of the 21<sup>st</sup> century under  
 47 four RCPs. The FSR was calculated as the number of the GCM-GGVM pairs showing  
 48 severe risk ( $\Gamma \geq 0.3$ ) divided by the total number of the GCM-GGVM pairs to show the  
 49 model consistency in supporting a severe risk. We generate the maps and integrate them  
 50 into Figure S4 using ArcGIS software.

51



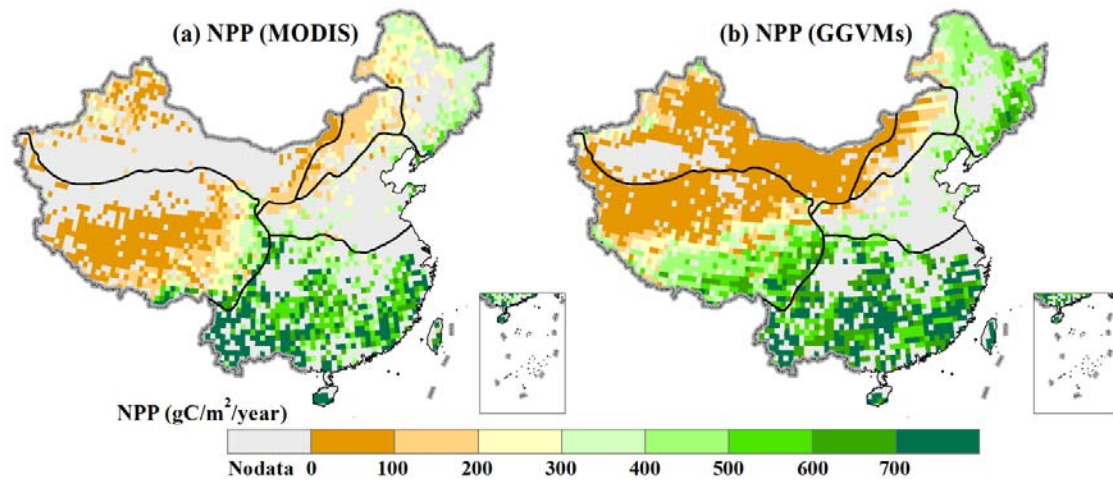

52

53 **Figure S5** Average annual NPP derived from MODIS (a) and the median of the average  
 54 annual NPP of GCM-GGVMs (b) during 2000-2005. We generate the maps and integrate  
 55 them into Figure S5 using ArcGIS software.

56

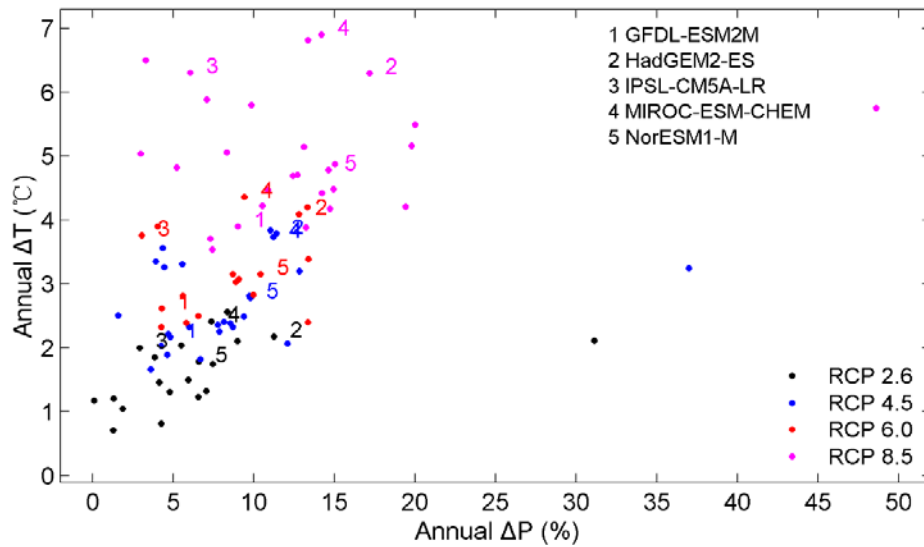

57

58 **Figure S6** The positions of the five selected GCMs in the space of relative changes in  
 59 annual precipitation ( $\Delta P$ ) and changes in annual temperature ( $\Delta T$ ) in China between the  
 60 end of the century (2071-2100) and present-day (1971-2000) from 30 GCMs. The 30  
 61 GCMs are bcc-csm1-1, bcc-csm1-1-m, CanESM2, CCSM4, CESM1-BGC, CESM1-  
 62 CAM5, CMCC-CESM, CMCC-CM, CMCC-CMS, CNRM-CM5, CSIRO-Mk3-6-0,  
 63 GFDL-ESM2G, GFDL-ESM2M, GISS-E2-H, GISS-E2-H-CC, GISS-E2-R, GISS-E2-R-  
 64 CC, inmem4, IPSL-CM5A-LR, IPSL-CM5A-MR, IPSL-CM5B-LR, MIROC5, MIROC-  
 65 ESM, MIROC-ESM-CHEM, MPI-ESM-LR, MPI-ESM-MR, MRI-CGCM3, NorESM1-  
 66 M, NorESM1-ME, and HadGEM2-ES. We generate the map using MATLAB software.

67 **Supplemental Tables**

68

69

**Table S1** Variable subsets used for analysis

| Subset        | Variables                                                            |
|---------------|----------------------------------------------------------------------|
| Carbon fluxes | Net primary production (NPP); fire carbon                            |
| Carbon stocks | Carbon contained in vegetation and soil                              |
| Water fluxes  | Transpiration; evaporation; runoff                                   |
| All           | Carbon fluxes; carbon stocks; water fluxes; soil water content (SWC) |

70

71 **Table S2** Relative change of variables in different eco-regions at the end of the 21<sup>st</sup> century (2071-2099) compared with the historical  
72 period (1981-2010) under RCP 8.5 (%)

| Zone     | Carbon stocks |            | Carbon fluxes |       | Water fluxes |             |               | SWC   |
|----------|---------------|------------|---------------|-------|--------------|-------------|---------------|-------|
|          | Carbon soil   | Carbon veg | Fire carbon   | NPP   | Runoff       | Evaporation | Transpiration |       |
| Zone I   | 28.08         | 11.6       | 10.74         | 42.74 | 3.24         | -21.47      | 18.35         | -8.89 |
| Zone II  | 15.88         | 76.53      | 76.26         | 43.28 | 33.29        | -18.26      | 15.08         | -8.98 |
| Zone III | 17.49         | 42.73      | 123.88        | 67.43 | 15.58        | -6.37       | 31.54         | -0.88 |
| Zone IV  | 24.29         | 56.04      | 6.09          | 43.29 | 28.93        | -9.41       | 15.41         | -8.83 |
| Zone V   | 37.69         | 103.2      | 82.16         | 97.28 | -1.04        | -32.14      | 42.08         | -3.71 |
| Zone VI  | 9.98          | 57.9       | 30.37         | 53.42 | -8.44        | -33.62      | 2.85          | -3.95 |

73

74

**Table S3** Overview of the GCMs and GGVMs

|       | Name           | Institute                                                                                                                                                                 | References                                                                 |
|-------|----------------|---------------------------------------------------------------------------------------------------------------------------------------------------------------------------|----------------------------------------------------------------------------|
| GCMs  | HadGEM2-ES     | Met Office Hadley Centre                                                                                                                                                  | <i>Jones et al.</i> <sup>1</sup>                                           |
|       | IPSL-CM5A-LR   | Institute Pierre-Simon Laplace                                                                                                                                            | <i>Mignot et al.</i> <sup>2</sup>                                          |
|       | MIROC-ESM-CHEM | Japan Agency for Marine-Earth Science and Technology, Atmosphere and Ocean Research Institute (The University of Tokyo), and National Institute for Environmental Studies | <i>Watanabe et al.</i> <sup>3</sup>                                        |
|       | GFDL-ESM2M     | Geophysical Fluid Dynamics Laboratory                                                                                                                                     | <i>Dunne et al.</i> <sup>4,5</sup>                                         |
|       | NorESM1-M      | Norwegian Climate Centre                                                                                                                                                  | <i>Bentsen et al.</i> <sup>6</sup> ;<br><i>Iversen et al.</i> <sup>7</sup> |
| GGVMs | JeDi           | Max-Planck-Institut für Biogeochemie (Germany)                                                                                                                            | <i>Pavlick et al.</i> <sup>8</sup>                                         |
|       | JULES          | Centre for Ecology and Hydrology (UK); Met Office Hadley                                                                                                                  | <i>Best et al.</i> <sup>9</sup> ;                                          |



|  |       |                                                      |                                                                           |
|--|-------|------------------------------------------------------|---------------------------------------------------------------------------|
|  |       | Centre (UK); University of Exeter (UK)               | <i>Clark et al.</i> <sup>10</sup>                                         |
|  | LPJmL | PIK (Germany)                                        | <i>Rost et al.</i> <sup>11</sup> ;<br><i>Bondeau et al.</i> <sup>12</sup> |
|  | VISIT | National Institute for Environmental Studies (Japan) | <i>Inatomi et al.</i> <sup>13</sup>                                       |

75

76

**Table S4** Variables reported by each GGVM, which were included in the calculation of  $\Gamma$ 

|       | NPP | Fire Carbon | Carbon_veg | Carbon_soil | Transpiration | Evaporation | Runoff | SWC |
|-------|-----|-------------|------------|-------------|---------------|-------------|--------|-----|
| JeDi  | √   | --          | √          | √           | √             | √           | √      | √   |
| JULES | √   | --          | √          | √           | --            | --          | √      | √   |
| LPJmL | √   | √           | √          | √           | √             | √           | √      | √   |
| VISIT | √   | √           | √          | √           | √             | √           | √      | √   |

77

Note: NPP, Carbon\_veg, Carbon\_soil and SWC are short for Net Primary Production, Carbon contained in vegetation, Carbon contained in soil and soil water content respectively.

78

79

**Table S5** Combinations of GCMs, GGVMs and RCPs used in the full model ensembles

| RCP   | gfdl-esm2m |     |     |     | hadgem2-es |     |     |     | ipsl-cm5a |     |     |     | miroc-esm-chem |     |     |     | noresm1-m |     |     |     |    |
|-------|------------|-----|-----|-----|------------|-----|-----|-----|-----------|-----|-----|-----|----------------|-----|-----|-----|-----------|-----|-----|-----|----|
|       | 8.5        | 6.0 | 4.5 | 2.6 | 8.5        | 6.0 | 4.5 | 2.6 | 8.5       | 6.0 | 4.5 | 2.6 | 8.5            | 6.0 | 4.5 | 2.6 | 8.5       | 6.0 | 4.5 | 2.6 |    |
| JeDi  | √          | √   | √   | √   | √          | √   | √   | √   | √         | √   | √   | √   | √              | √   | √   | √   | √         | √   | √   | √   | √  |
| JULES | √          | √   | √   | √   | √          | √   | √   | √   | √         | √   | √   | √   | √              | √   | √   | √   | √         | √   | √   | √   | √  |
| LPJmL | √          | √   | √   | √   | √          | √   | √   | √   | √         | √   | √   | √   | √              | √   | √   | √   | √         | √   | √   | √   | √  |
| VISIT | √          | --  | --  | √   | √          | --  | --  | √   | √         | --  | --  | √   | --             | --  | --  | --  | --        | --  | --  | --  | -- |

80

81

**Table S6** Eco-regions and climatic indices<sup>14</sup>

| Serial | Eco-regions                            | Typical climatic indices               |               |
|--------|----------------------------------------|----------------------------------------|---------------|
|        |                                        | Days of accumulated temperature >10 °C | Aridity index |
| I      | Cold temperate humid region            | <170                                   | <1.5          |
| II     | Temperate humid/sub-humid region       | 100-220                                | 1.5-4         |
| III    | Northwest arid region                  | 100-220                                | >4            |
| IV     | Warm temperate humid/ sub-humid region | 171-220                                | <1.5          |
| V      | Tibetan Plateau region                 | <180                                   | --            |
| VI     | Tropical and sub-tropical humid region | >221                                   | <1            |

## 82 References

- 83 [1] Jones, C. D. et al. The HadGEM2-ES implementation of CMIP5 centennial simulations. *Geosci.*  
84 *Model Dev.* **4**, 543-570 (2011).
- 85 [2] Mignot, J., & Bony, S. Presentation and analysis of the IPSL and CNRM climate models used in  
86 CMIP5. *Clim. Dynam.* **40**, 2089, doi: 10.1007/s00382-013-1720-1 (2013).
- 87 [3] Watanabe, S. et al. MIROC-ESM 2010: model description and basic results of CMIP5-20c3m  
88 experiments. *Geosci. Model Dev.* **4**, 845-872 (2011).
- 89 [4] Dunne, J. P. et al. GFDL's ESM2 global coupled climate-carbon earth system models, part 1:  
90 physical formulation and baseline simulation characteristics. *J. Climate.* **25**, 6646-6665 (2012).
- 91 [5] Dunne, J. P. et al. GFDL's ESM2 global coupled climate-carbon earth system models, part 2:  
92 carbon system formulation and baseline simulation characteristics. *J. Climate.* **26**, 2247-2267 (2013).
- 93 [6] Bentsen, M. et al. The Norwegian Earth System Model, NorESM1-M – part 1: description and  
94 basic evaluation of the physical climate. *Geosci. Model Dev.* **6**, 687-720 (2013).
- 95 [7] Iversen, T. et al. The Norwegian Earth System Model, NorESM1-M – part 2: climate response and  
96 scenario projections. *Geosci. Model Dev.* **6**, 389-415 (2013).
- 97 [8] Pavlick, R., Drewry, D. T., Bohn, K., Reu, B., & Kleidon, A. The Jena Diversity-Dynamic Global  
98 Vegetation Model (JeDi-DGVM): a diverse approach to representing terrestrial biogeography and  
99 biogeochemistry based on plant functional trade-offs. *Biogeosciences* **10**, 4137-4177 (2013).
- 100 [9] Best, M. J. et al. The Joint UK Land Environment Simulator (JULES), model description – part 1:  
101 energy and water fluxes. *Geosci. Model Dev.* **4**, 677-699 (2011).
- 102 [10] Clark, D. B. et al. The Joint UK Land Environment Simulator (JULES), model description – part 2:  
103 carbon fluxes and vegetation. *Geosci. Model Dev.* **4**, 701-722 (2011).
- 104 [11] Rost, S. et al. Agricultural green and blue water consumption and its influence on the global water  
105 system. *Water Resour. Res.* **44**, 1-17 (2008).
- 106 [12] Bondeau, A. et al. Modelling the role of agriculture for the 20<sup>th</sup> century global terrestrial carbon  
107 balance. *Global Change Biol.* **13**, 679-706 (2007).
- 108 [13] Inatomi, M., Ito, A., Ishijima, K., & Murayama, S. Greenhouse gas budget of a cool-temperate  
109 deciduous broad-leaved forest in Japan estimated using a process-based model. *Ecosystems* **13**, 472-483  
110 (2010).
- 111 [14] Zheng, D. A study on the eco-geographic regional system of China. Food Agricultural  
112 Organization (FAO), FRA 2000: Global ecological zones mapping. Cambridge, United Kingdom (1999).
